# Supplementary material for: Time to improve statin prescription guidelines in low-risk patients?
Source: PubMed Central journal article supplement — Eur J Prev Cardiol. 2017 Mar 14;24(10):1064–70. doi: 10.1177/2047487317698585 (PMC5476184; doi:10.1177/2047487317698585), 2017-03-14
Supplement: CPR698585_supplementary_material.pdf [file CPR698585_supplementary_material.pdf]

**Supplementary Table 1.** Risk factor profiling based on *Berry et al.*<sup>11</sup>

| <b>Risk profile</b> | <b>Cholesterol<br/>(mmol/l)</b> | <b>DBP<br/>(mmHg)</b> | <b>SBP<br/>(mmHg)</b> | <b>Hypertension<br/>Treatment</b> | <b>Smoking</b> | <b>Diabetes</b> |
|---------------------|---------------------------------|-----------------------|-----------------------|-----------------------------------|----------------|-----------------|
| Optimal             | < 4.7                           | < 80                  | < 120                 | no                                | no             | no              |
| Not optimal         | 4.7 – 5.17                      | 80 – 89               | 120 – 139             | no                                | no             | no              |
| Elevated            | 5.18 – 6.18                     | 90 – 99               | 140 – 159             | no                                | no             | no              |
| Major               | ≥ 6.19                          | ≥ 100                 | ≥ 160                 | yes                               | yes            | yes             |

Risk factors were viewed as optimal when a participant had untreated systolic and diastolic blood pressure of less than 120 and 80 mm Hg respectively, untreated total cholesterol levels lower than 4.7 mmol/l, was a nonsmoker, and did not have diabetes. Increased levels of total cholesterol (4.7 – 5.17 mmol/l), increased levels of untreated systolic (120 – 139 mm Hg) or diastolic (80 – 89 mm Hg) in nonsmokers without diabetes were considered as not optimal risk factors. Elevated risk factors were defined as untreated systolic blood pressure between 140 and 159 mm Hg, systolic blood pressure between 90 and 99 mm Hg, untreated total cholesterol levels between 5.17 and 6.18 mmol/l in nonsmokers without diabetes. Major risk factors were defined as treatment for hypertension, untreated systolic or diastolic blood pressure of at least 160 or 100 mm Hg, respectively, untreated total cholesterol levels above 6.18 mmol/l, current smokers or having diabetes. Abbreviations: DBP, diastolic blood pressure; SBP, systolic blood pressure.
